# Supplementary material
Source: PubMed Central journal article supplement (PMC4920070)
Supplement: NIHMS769550-supplement-supp_note_1.pdf [file NIHMS769550-supplement-supp_note_1.pdf]

## **Supplementary Note 1 for Shimada *et al.***

### **Contents**

1. Structures of 56 CILs (p.1)
2. CIL41/70 structural analogs (p.4)

|                                                                                                                                  |                                                                                                                                 |                                                                                                                                   |                                                                                                                                    |
|----------------------------------------------------------------------------------------------------------------------------------|---------------------------------------------------------------------------------------------------------------------------------|-----------------------------------------------------------------------------------------------------------------------------------|------------------------------------------------------------------------------------------------------------------------------------|
| 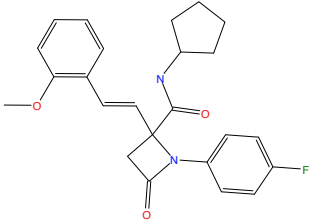 <p><b>CIL01</b><br/>Pubchem CID: 5771107</p>   |  <p><b>CIL02</b><br/>Pubchem CID: 698314</p>   |  <p><b>CIL04</b><br/>Pubchem CID: 2927276</p>   |  <p><b>CIL05</b><br/>Pubchem CID: 2802124</p>   |
|  <p><b>CIL06</b><br/>Pubchem CID: 776372</p>    |  <p><b>CIL07</b><br/>Pubchem CID: 3113288</p>  |  <p><b>CIL09</b><br/>Pubchem CID: 791069</p>    |  <p><b>CIL10</b><br/>Pubchem CID: 3221079</p>   |
|  <p><b>CIL11</b><br/>Pubchem CID: 96149</p>    |  <p><b>CIL13</b><br/>Pubchem CID: 972880</p>  |  <p><b>CIL15</b><br/>Pubchem CID: 2215161</p>  |  <p><b>CIL16</b><br/>Pubchem CID: 2221997</p>  |
|  <p><b>CIL17</b><br/>Pubchem CID: 1316704</p> |  <p><b>CIL18</b><br/>Pubchem CID: 659917</p> |  <p><b>CIL20</b><br/>Pubchem CID: 609767</p>  |  <p><b>CIL22</b><br/>Pubchem CID: 779573</p>  |
|  <p><b>CIL23</b><br/>Pubchem CID: 779863</p>  |  <p><b>CIL25</b><br/>Pubchem CID: 796505</p> |  <p><b>CIL26</b><br/>Pubchem CID: 3732278</p> |  <p><b>CIL27</b><br/>Pubchem CID: 1717988</p> |

|                                                                                                                                  |                                                                                                                                  |                                                                                                                                   |                                                                                                                                   |
|----------------------------------------------------------------------------------------------------------------------------------|----------------------------------------------------------------------------------------------------------------------------------|-----------------------------------------------------------------------------------------------------------------------------------|-----------------------------------------------------------------------------------------------------------------------------------|
| 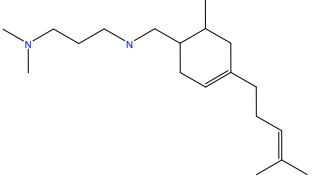 <p><b>CIL28</b><br/>Pubchem CID: 2855628</p>   |  <p><b>CIL33</b><br/>Pubchem CID: 5333738</p>   |  <p><b>CIL34</b><br/>Pubchem CID: 781106</p>    |  <p><b>CIL36</b><br/>Pubchem CID: 2057920</p>  |
|  <p><b>CIL40</b><br/>Pubchem CID: 2837694</p>   |  <p><b>CIL41</b><br/>Pubchem CID: 2841722</p>   |  <p><b>CIL44</b><br/>Pubchem CID: 2259838</p>   |  <p><b>CIL46</b><br/>Pubchem CID: 5728915</p>  |
|  <p><b>CIL47</b><br/>Pubchem CID: 2904443</p>  |  <p><b>CIL48</b><br/>Pubchem CID: 1263400</p>  |  <p><b>CIL49</b><br/>Pubchem CID: 5286934</p>  |  <p><b>CIL50</b><br/>Pubchem CID: 5308990</p> |
|  <p><b>CIL51</b><br/>Pubchem CID: 2946035</p> |  <p><b>CIL52</b><br/>Pubchem CID: 2857031</p> |  <p><b>CIL55</b><br/>Pubchem CID: 6623618</p> |  <p><b>CIL56</b><br/>Pubchem CID: 654092</p> |
|  <p><b>CIL58</b><br/>Pubchem CID: 699693</p>  |  <p><b>CIL60</b><br/>Pubchem CID: 779647</p>  |  <p><b>CIL62</b><br/>Pubchem CID: 991372</p>  |  <p><b>CIL63</b><br/>Pubchem CID: 779402</p> |

|                                                                                                                                  |                                                                                                                                 |                                                                                                                                  |                                                                                                                                   |
|----------------------------------------------------------------------------------------------------------------------------------|---------------------------------------------------------------------------------------------------------------------------------|----------------------------------------------------------------------------------------------------------------------------------|-----------------------------------------------------------------------------------------------------------------------------------|
| 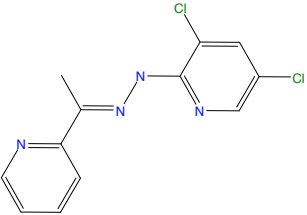 <p><b>CIL64</b><br/>Pubchem CID: 3351416</p>   |  <p><b>CIL66</b><br/>Pubchem CID: 657546</p>   |  <p><b>CIL67</b><br/>Pubchem CID: 659101</p>   |  <p><b>CIL69</b><br/>Pubchem CID: 818740</p>   |
|  <p><b>CIL70</b><br/>Pubchem CID: 9551837</p>   |  <p><b>CIL71</b><br/>Pubchem CID: 658723</p>   |  <p><b>CIL72</b><br/>Pubchem CID: 658341</p>   |  <p><b>CIL74</b><br/>Pubchem CID: 4406635</p>  |
|  <p><b>CIL75</b><br/>Pubchem CID: 818737</p>   |  <p><b>CIL76</b><br/>Pubchem CID: 3774616</p> |  <p><b>CIL77</b><br/>Pubchem CID: 6298513</p> |  <p><b>CIL79</b><br/>Pubchem CID: 6545175</p> |
|  <p><b>CIL80</b><br/>Pubchem CID: 1187467</p> |  <p><b>CIL87</b><br/>Pubchem CID: NA</p>     |  <p><b>CIL88</b><br/>Pubchem CID: NA</p>     |  <p><b>CIL89</b><br/>Pubchem CID: NA</p>     |

|                                                                                     |                                                                                     |                                                                                      |                                                                                       |
|-------------------------------------------------------------------------------------|-------------------------------------------------------------------------------------|--------------------------------------------------------------------------------------|---------------------------------------------------------------------------------------|
| 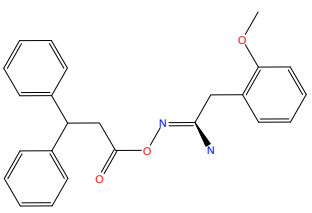   |    |    |    |
| CB122 0.98 ug/mL                                                                    | CIL70 1.59 ug/mL                                                                    | VM1 2 ug/mL                                                                          | CB69 2.09 ug/mL                                                                       |
|    |    |    |    |
| CB115 2.42 ug/mL                                                                    | MB14 2.6 ug/mL                                                                      | CIL41 2.8 ug/mL                                                                      | B02 3.3 ug/mL                                                                         |
|   |   |   |   |
| CB56 4.05 ug/mL                                                                     | CB98 4.46 ug/mL                                                                     | CB147 4.88 ug/mL                                                                     | A05 5.04 ug/mL                                                                        |
|  |  |  |  |
| CB116 5.49 ug/mL                                                                    | MB6 6.48 ug/mL                                                                      | CB49 7.23 ug/mL                                                                      | CB140 8.45 ug/mL                                                                      |
|  |  |  |  |
| VM3 8.51 ug/mL                                                                      | CB62 8.63 ug/mL                                                                     | CB126 9.3 ug/mL                                                                      | CB18 10.21 ug/m                                                                       |

|                                                                                                                   |                                                                                                                   |                                                                                                                    |                                                                                                                     |
|-------------------------------------------------------------------------------------------------------------------|-------------------------------------------------------------------------------------------------------------------|--------------------------------------------------------------------------------------------------------------------|---------------------------------------------------------------------------------------------------------------------|
| 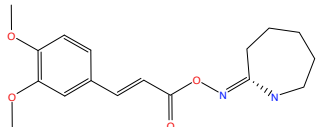 <p>EN2      10.51 ug/m</p>      |  <p>CB111      10.71 ug/m</p>    |  <p>AS2      12.26 ug/m</p>      |  <p>CB14      13.98 ug/m</p>     |
|  <p>ZE2      15.63 ug/m</p>      |  <p>CB58      17.61 ug/m</p>     |  <p>AS1      &gt;20 ug/mL</p>    |  <p>CB1      &gt;20 ug/mL</p>    |
|  <p>CB2      &gt;20 ug/mL</p>   |  <p>CB3      &gt;20 ug/mL</p>   |  <p>CB4      &gt;20 ug/mL</p>   |  <p>CB5      &gt;20 ug/mL</p>   |
|  <p>CB6      &gt;20 ug/mL</p>  |  <p>CB7      &gt;20 ug/mL</p>  |  <p>CB8      &gt;20 ug/mL</p>  |  <p>CB9      &gt;20 ug/mL</p>  |
|  <p>CB10      &gt;20 ug/mL</p> |  <p>CB11      &gt;20 ug/mL</p> |  <p>CB12      &gt;20 ug/mL</p> |  <p>CB13      &gt;20 ug/mL</p> |

|                                                                                                              |                                                                                                              |                                                                                                               |                                                                                                                |
|--------------------------------------------------------------------------------------------------------------|--------------------------------------------------------------------------------------------------------------|---------------------------------------------------------------------------------------------------------------|----------------------------------------------------------------------------------------------------------------|
| 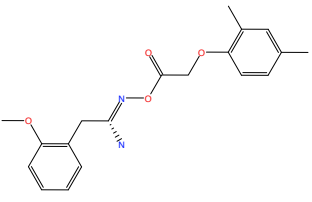 <p>CB15 &gt;20 ug/mL</p>   |  <p>CB16 &gt;20 ug/mL</p>   |  <p>CB17 &gt;20 ug/mL</p>   |  <p>CB19 &gt;20 ug/mL</p>   |
|  <p>CB20 &gt;20 ug/mL</p>   |  <p>CB21 &gt;20 ug/mL</p>   |  <p>CB22 &gt;20 ug/mL</p>   |  <p>CB23 &gt;20 ug/mL</p>   |
|  <p>CB24 &gt;20 ug/mL</p>  |  <p>CB25 &gt;20 ug/mL</p>  |  <p>CB26 &gt;20 ug/mL</p>  |  <p>CB27 &gt;20 ug/mL</p>  |
|  <p>CB28 &gt;20 ug/mL</p> |  <p>CB29 &gt;20 ug/mL</p> |  <p>CB30 &gt;20 ug/mL</p> |  <p>CB31 &gt;20 ug/mL</p> |
|  <p>CB32 &gt;20 ug/mL</p> |  <p>CB33 &gt;20 ug/mL</p> |  <p>CB34 &gt;20 ug/mL</p> |  <p>CB35 &gt;20 ug/mL</p> |

|                                                                                                       |                                                                                                       |                                                                                                        |                                                                                                         |
|-------------------------------------------------------------------------------------------------------|-------------------------------------------------------------------------------------------------------|--------------------------------------------------------------------------------------------------------|---------------------------------------------------------------------------------------------------------|
| 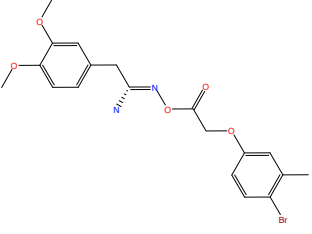<br>CB36 >20 ug/mL   | <br>CB37 >20 ug/mL   | <br>CB38 >20 ug/mL   | <br>CB39 >20 ug/mL   |
| <br>CB40 >20 ug/mL   | <br>CB41 >20 ug/mL   | <br>CB42 >20 ug/mL   | <br>CB43 >20 ug/mL   |
| <br>CB44 >20 ug/mL  | <br>CB45 >20 ug/mL  | <br>CB46 >20 ug/mL  | <br>CB47 >20 ug/mL  |
| <br>CB48 >20 ug/mL | <br>CB50 >20 ug/mL | <br>CB51 >20 ug/mL | <br>CB52 >20 ug/mL |
| <br>CB53 >20 ug/mL | <br>CB54 >20 ug/mL | <br>CB55 >20 ug/mL | <br>CB57 >20 ug/mL |



|                                                                                                              |                                                                                                              |                                                                                                               |                                                                                                                |
|--------------------------------------------------------------------------------------------------------------|--------------------------------------------------------------------------------------------------------------|---------------------------------------------------------------------------------------------------------------|----------------------------------------------------------------------------------------------------------------|
| 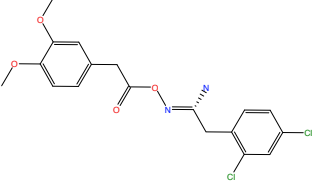 <p>CB59 &gt;20 ug/mL</p>   |  <p>CB60 &gt;20 ug/mL</p>   |  <p>CB61 &gt;20 ug/mL</p>   |  <p>CB63 &gt;20 ug/mL</p>   |
|  <p>CB64 &gt;20 ug/mL</p>   |  <p>CB65 &gt;20 ug/mL</p>   |  <p>CB66 &gt;20 ug/mL</p>   |  <p>CB67 &gt;20 ug/mL</p>   |
|  <p>CB68 &gt;20 ug/mL</p>  |  <p>CB70 &gt;20 ug/mL</p>  |  <p>CB71 &gt;20 ug/mL</p>  |  <p>CB72 &gt;20 ug/mL</p>  |
|  <p>CB73 &gt;20 ug/mL</p> |  <p>CB74 &gt;20 ug/mL</p> |  <p>CB75 &gt;20 ug/mL</p> |  <p>CB76 &gt;20 ug/mL</p> |
|  <p>CB77 &gt;20 ug/mL</p> |  <p>CB78 &gt;20 ug/mL</p> |  <p>CB79 &gt;20 ug/mL</p> |  <p>CB80 &gt;20 ug/mL</p> |

|                                                                                                              |                                                                                                              |                                                                                                                |                                                                                                                 |
|--------------------------------------------------------------------------------------------------------------|--------------------------------------------------------------------------------------------------------------|----------------------------------------------------------------------------------------------------------------|-----------------------------------------------------------------------------------------------------------------|
| 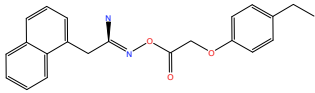 <p>CB81 &gt;20 ug/mL</p>   |  <p>CB82 &gt;20 ug/mL</p>   |  <p>CB83 &gt;20 ug/mL</p>    |  <p>CB84 &gt;20 ug/mL</p>    |
|  <p>CB85 &gt;20 ug/mL</p>   |  <p>CB86 &gt;20 ug/mL</p>   |  <p>CB87 &gt;20 ug/mL</p>    |  <p>CB88 &gt;20 ug/mL</p>    |
|  <p>CB89 &gt;20 ug/mL</p>  |  <p>CB90 &gt;20 ug/mL</p>  |  <p>CB91 &gt;20 ug/mL</p>   |  <p>CB92 &gt;20 ug/mL</p>   |
|  <p>CB93 &gt;20 ug/mL</p> |  <p>CB94 &gt;20 ug/mL</p> |  <p>CB95 &gt;20 ug/mL</p>  |  <p>CB96 &gt;20 ug/mL</p>  |
|  <p>CB97 &gt;20 ug/mL</p> |  <p>CB99 &gt;20 ug/mL</p> |  <p>CB100 &gt;20 ug/mL</p> |  <p>CB101 &gt;20 ug/mL</p> |

|                                                                                                               |                                                                                                               |                                                                                                                |                                                                                                                 |
|---------------------------------------------------------------------------------------------------------------|---------------------------------------------------------------------------------------------------------------|----------------------------------------------------------------------------------------------------------------|-----------------------------------------------------------------------------------------------------------------|
| 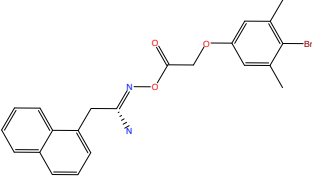 <p>CB102 &gt;20 ug/mL</p>   |  <p>CB103 &gt;20 ug/mL</p>   |  <p>CB104 &gt;20 ug/mL</p>   |  <p>CB105 &gt;20 ug/mL</p>   |
|  <p>CB106 &gt;20 ug/mL</p>   |  <p>CB107 &gt;20 ug/mL</p>   |  <p>CB108 &gt;20 ug/mL</p>   |  <p>CB109 &gt;20 ug/mL</p>   |
|  <p>CB110 &gt;20 ug/mL</p>  |  <p>CB112 &gt;20 ug/mL</p>  |  <p>CB113 &gt;20 ug/mL</p>  |  <p>CB114 &gt;20 ug/mL</p>  |
|  <p>CB117 &gt;20 ug/mL</p> |  <p>CB118 &gt;20 ug/mL</p> |  <p>CB119 &gt;20 ug/mL</p> |  <p>CB120 &gt;20 ug/mL</p> |
|  <p>CB121 &gt;20 ug/mL</p> |  <p>CB123 &gt;20 ug/mL</p> |  <p>CB124 &gt;20 ug/mL</p> |  <p>CB125 &gt;20 ug/mL</p> |

|                                                                                                               |                                                                                                               |                                                                                                                |                                                                                                                 |
|---------------------------------------------------------------------------------------------------------------|---------------------------------------------------------------------------------------------------------------|----------------------------------------------------------------------------------------------------------------|-----------------------------------------------------------------------------------------------------------------|
| 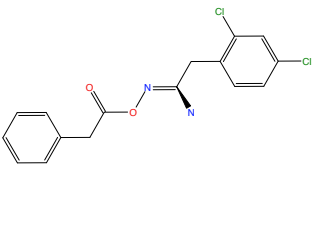 <p>CB127 &gt;20 ug/mL</p>   |  <p>CB128 &gt;20 ug/mL</p>   |  <p>CB129 &gt;20 ug/mL</p>   |  <p>CB130 &gt;20 ug/mL</p>   |
|  <p>CB131 &gt;20 ug/mL</p>   |  <p>CB132 &gt;20 ug/mL</p>   |  <p>CB133 &gt;20 ug/mL</p>   |  <p>CB134 &gt;20 ug/mL</p>   |
|  <p>CB135 &gt;20 ug/mL</p>  |  <p>CB136 &gt;20 ug/mL</p>  |  <p>CB137 &gt;20 ug/mL</p>  |  <p>CB138 &gt;20 ug/mL</p>  |
|  <p>CB139 &gt;20 ug/mL</p> |  <p>CB141 &gt;20 ug/mL</p> |  <p>CB142 &gt;20 ug/mL</p> |  <p>CB143 &gt;20 ug/mL</p> |
|  <p>CB144 &gt;20 ug/mL</p> |  <p>CB145 &gt;20 ug/mL</p> |  <p>CB146 &gt;20 ug/mL</p> |  <p>CB148 &gt;20 ug/mL</p> |

|                                                                                                             |                                                                                                             |                                                                                                              |                                                                                                                |
|-------------------------------------------------------------------------------------------------------------|-------------------------------------------------------------------------------------------------------------|--------------------------------------------------------------------------------------------------------------|----------------------------------------------------------------------------------------------------------------|
| 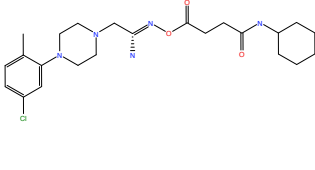 <p>CD1 &gt;20 ug/mL</p>   |  <p>EN1 &gt;20 ug/mL</p>   |  <p>EN3 &gt;20 ug/mL</p>   |  <p>EN4 &gt;20 ug/mL</p>    |
|  <p>EN5 &gt;20 ug/mL</p>   |  <p>EN6 &gt;20 ug/mL</p>   |  <p>EN7 &gt;20 ug/mL</p>   |  <p>EN8 &gt;20 ug/mL</p>    |
|  <p>EN9 &gt;20 ug/mL</p>  |  <p>EN10 &gt;20 ug/mL</p> |  <p>EN11 &gt;20 ug/mL</p> |  <p>MB1 &gt;20 ug/mL</p>   |
|  <p>MB2 &gt;20 ug/mL</p> |  <p>MB3 &gt;20 ug/mL</p> |  <p>MB4 &gt;20 ug/mL</p> |  <p>MB5 &gt;20 ug/mL</p>  |
|  <p>MB7 &gt;20 ug/mL</p> |  <p>MB8 &gt;20 ug/mL</p> |  <p>MB9 &gt;20 ug/mL</p> |  <p>MB10 &gt;20 ug/mL</p> |

|                                                                                                                    |                                                                                                                     |                                                                                                                      |                                                                                                                       |
|--------------------------------------------------------------------------------------------------------------------|---------------------------------------------------------------------------------------------------------------------|----------------------------------------------------------------------------------------------------------------------|-----------------------------------------------------------------------------------------------------------------------|
| 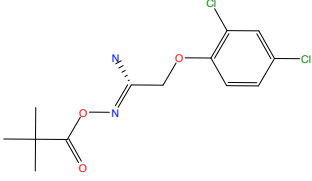 <p><b>MB11</b> &gt;20 ug/mL</p>  |  <p><b>MB12</b> &gt;20 ug/mL</p>   |  <p><b>MB13</b> &gt;20 ug/mL</p>   |  <p><b>MB15</b> &gt;20 ug/mL</p>   |
|  <p><b>MB16</b> &gt;20 ug/mL</p>  |  <p><b>MB17</b> &gt;20 ug/mL</p>   |  <p><b>VM2</b> &gt;20 ug/mL</p>    |  <p><b>VM4</b> &gt;20 ug/mL</p>    |
|  <p><b>VM5</b> &gt;20 ug/mL</p>  |  <p><b>ZE1</b> &gt;20 ug/mL</p>   |  <p><b>ZE3</b> &gt;20 ug/mL</p>   |  <p><b>ZE4</b> &gt;20 ug/mL</p>   |
|  <p><b>ZE5</b> &gt;20 ug/mL</p> |  <p><b>ZE6</b> &gt;20 ug/mL</p>  |  <p><b>ZE7</b> &gt;20 ug/mL</p>  |  <p><b>ZE8</b> &gt;20 ug/mL</p>  |
|  <p><b>ZE9</b> &gt;20 ug/mL</p> |  <p><b>ZE10</b> &gt;20 ug/mL</p> |  <p><b>ZE11</b> &gt;20 ug/mL</p> |  <p><b>ZE12</b> &gt;20 ug/mL</p> |

|                                                                                                            |                                                                                                            |                                                                                                             |                                                                                                              |
|------------------------------------------------------------------------------------------------------------|------------------------------------------------------------------------------------------------------------|-------------------------------------------------------------------------------------------------------------|--------------------------------------------------------------------------------------------------------------|
| 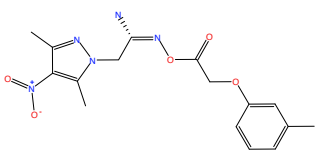 <p>ZE13 &gt;20 ug/mL</p> |  <p>ZE14 &gt;20 ug/mL</p> |  <p>ZE15 &gt;20 ug/mL</p> |  <p>ZE16 &gt;20 ug/mL</p> |
|  <p>ZE17 &gt;20 ug/mL</p> |                                                                                                            |                                                                                                             |                                                                                                              |
